# Supplementary material
Source: Springer Nature journal article supplement (https://www.springermedizin.de/resource/supplementary/12889_2013_6868_MOESM1_ESM.pdf/9499154)
Supplement: MOESM1 [file 9499154]

**Supplement Table 1 – Re-weighted association of education, and zip code median income quintile with in-hospital, discharge to 1 year, and 1-5 year mortality after a first apparent myocardial infarction in women.**

|                                      | All Women    |              |        | Women 66-79 years |                     |              | Women 80+ years |                     |              |
|--------------------------------------|--------------|--------------|--------|-------------------|---------------------|--------------|-----------------|---------------------|--------------|
|                                      | RR or        | 95% Conf Int | Pvalue | RR or             | 95% Conf Int        | Pvalue       | RR or           | 95% Conf Int        | Pvalue       |
| <b>In Hospital Mortality</b>         |              |              |        |                   |                     |              |                 |                     |              |
| N (Events)                           | 8,043 (1153) |              |        | 4,223 (454)       |                     |              | 3,820 (699)     |                     |              |
| Ed < HS                              | 1.04         | (0.80, 1.34) | 0.791  | 0.85              | (0.55, 1.32)        | 0.477        | 1.14            | (0.83, 1.58)        | 0.412        |
| Ed HS < BS                           | 1.06         | (0.82, 1.37) | 0.644  | 0.77              | (0.50, 1.19)        | 0.241        | 1.28            | (0.93, 1.76)        | 0.125        |
| Zip Inc q1                           | 1.08         | (0.88, 1.33) | 0.479  | 1.35              | (0.97, 1.88)        | 0.072        | 0.92            | (0.69, 1.21)        | 0.537        |
| Zip Inc q2                           | 1.00         | (0.83, 1.21) | 1.000  | 1.15              | (0.83, 1.57)        | 0.399        | 0.93            | (0.74, 1.17)        | 0.540        |
| Zip Inc q3                           | 0.93         | (0.77, 1.13) | 0.483  | 0.95              | (0.67, 1.34)        | 0.752        | 0.93            | (0.74, 1.17)        | 0.536        |
| Zip Inc q4                           | 0.89         | (0.74, 1.07) | 0.212  | 0.82              | (0.60, 1.12)        | 0.217        | 0.95            | (0.76, 1.19)        | 0.664        |
| <b>Discharge - 365 day Mortality</b> |              |              |        |                   |                     |              |                 |                     |              |
| N (Events)                           | 6,852 (1392) |              |        | 3,760 (484)       |                     |              | 3,092 (908)     |                     |              |
| Ed < HS                              | 1.06         | (0.85, 1.32) | 0.616  | 1.26              | (0.81, 1.95)        | 0.307        | 1.01            | (0.78, 1.30)        | 0.936        |
| Ed HS < BS                           | 0.92         | (0.73, 1.15) | 0.449  | 0.98              | (0.63, 1.52)        | 0.926        | 0.92            | (0.71, 1.19)        | 0.531        |
| Zip Inc q1                           | 1.04         | (0.87, 1.25) | 0.662  | 0.89              | (0.63, 1.26)        | 0.515        | 1.10            | (0.90, 1.36)        | 0.350        |
| Zip Inc q2                           | 1.04         | (0.89, 1.22) | 0.605  | 0.94              | (0.69, 1.27)        | 0.672        | 1.08            | (0.90, 1.30)        | 0.389        |
| Zip Inc q3                           | 1.02         | (0.87, 1.20) | 0.765  | 0.97              | (0.72, 1.30)        | 0.829        | 1.04            | (0.86, 1.26)        | 0.672        |
| Zip Inc q4                           | 1.01         | (0.86, 1.18) | 0.884  | 0.88              | (0.64, 1.20)        | 0.415        | 1.08            | (0.90, 1.29)        | 0.421        |
| <b>366 days - 5 year Mortality</b>   |              |              |        |                   |                     |              |                 |                     |              |
| N (Events)                           | 5,460 (729)  |              |        | 3,276 (900)       |                     |              | 2,184 (1518)    |                     |              |
| Ed < HS                              | 1.26         | (0.99, 1.62) | 0.064  | <b>1.83</b>       | <b>(1.17, 2.86)</b> | <b>0.008</b> | 0.99            | (0.74, 1.34)        | 0.971        |
| Ed HS < BS                           | 1.13         | (0.89, 1.45) | 0.317  | <b>1.56</b>       | <b>(1.01, 2.42)</b> | <b>0.046</b> | 0.93            | (0.68, 1.26)        | 0.628        |
| Zip Inc q1                           | 0.94         | (0.77, 1.16) | 0.561  | 1.05              | (0.78, 1.42)        | 0.762        | 0.88            | (0.67, 1.16)        | 0.351        |
| Zip Inc q2                           | 0.87         | (0.72, 1.05) | 0.140  | 0.92              | (0.69, 1.22)        | 0.551        | 0.85            | (0.67, 1.09)        | 0.200        |
| Zip Inc q3                           | 0.86         | (0.72, 1.02) | 0.086  | 0.99              | (0.77, 1.28)        | 0.959        | <b>0.77</b>     | <b>(0.61, 0.98)</b> | <b>0.034</b> |
| Zip Inc q4                           | 0.97         | (0.81, 1.15) | 0.697  | 1.04              | (0.80, 1.36)        | 0.768        | 0.93            | (0.73, 1.18)        | 0.562        |

Abbreviations: RR = Relative Risk (In-hospital and Discharge - 365 day mortality); HRR = Hazard Rate Ratio (1-5 year

Adjusted for Age, race, hx of hypertension, hx of diabetes, hx of lipidemia, hx of CHD, hx of stroke, and coronary revascularization (PCI or CABG) during hospitalization, year of MI.

Education referent group is college degree or more.

Zip code median income referent group is quintile 5 (highest median income).

**Supplement Table 2 – Re-weighted association of education, and zip code median income quintile with in-hospital, discharge to 1 year, and 1-5 year mortality after a first apparent myocardial infarction in men.**

|                                      | All Men      |                     |              | Men 66-79 years |                     |              | Men 80+ years |                     |              |
|--------------------------------------|--------------|---------------------|--------------|-----------------|---------------------|--------------|---------------|---------------------|--------------|
|                                      | RR or HRR    | 95% Conf Int        | Pvalue       | RR or HRR       | 95% Conf Int        | Pvalue       | RR or HRR     | 95% Conf Int        | Pvalue       |
| <b>In Hospital Mortality</b>         |              |                     |              |                 |                     |              |               |                     |              |
| N (Events)                           | 7,929 (1059) |                     |              | 5,314 (527)     |                     |              | 2,615 (532)   |                     |              |
| Ed < HS                              | 1.04         | (0.84, 1.29)        | 0.695        | 1.02            | (0.74, 1.40)        | 0.916        | 1.07          | (0.81, 1.42)        | 0.627        |
| Ed HS < BS                           | 1.03         | (0.83, 1.27)        | 0.818        | 1.05            | (0.76, 1.43)        | 0.778        | 0.99          | (0.74, 1.32)        | 0.952        |
| Zip Inc q1                           | 1.05         | (0.83, 1.34)        | 0.664        | 1.05            | (0.74, 1.48)        | 0.796        | 1.06          | (0.76, 1.47)        | 0.751        |
| Zip Inc q2                           | 1.03         | (0.84, 1.26)        | 0.798        | 1.02            | (0.75, 1.39)        | 0.883        | 1.04          | (0.79, 1.37)        | 0.785        |
| Zip Inc q3                           | 1.19         | (0.98, 1.44)        | 0.079        | 1.31            | (0.99, 1.74)        | 0.061        | 1.09          | (0.84, 1.41)        | 0.501        |
| Zip Inc q4                           | 1.05         | (0.87, 1.27)        | 0.605        | 0.93            | (0.69, 1.25)        | 0.616        | 1.19          | (0.92, 1.52)        | 0.183        |
| <b>Discharge - 365 day Mortality</b> |              |                     |              |                 |                     |              |               |                     |              |
| N (Events)                           | 6,850 (1377) |                     |              | 4,776 (709)     |                     |              | 2,074 (668)   |                     |              |
| Ed < HS                              | 1.00         | (0.84, 1.18)        | 0.959        | 0.99            | (0.78, 1.27)        | 0.952        | 0.99          | (0.79, 1.25)        | 0.958        |
| Ed HS < BS                           | 0.96         | (0.81, 1.14)        | 0.612        | 0.92            | (0.72, 1.17)        | 0.482        | 0.99          | (0.79, 1.26)        | 0.962        |
| Zip Inc q1                           | 1.18         | (0.99, 1.42)        | 0.068        | 1.05            | (0.80, 1.38)        | 0.741        | <b>1.32</b>   | <b>(1.03, 1.69)</b> | <b>0.028</b> |
| Zip Inc q2                           | 1.03         | (0.88, 1.22)        | 0.694        | 0.89            | (0.69, 1.15)        | 0.384        | 1.20          | (0.97, 1.48)        | 0.098        |
| Zip Inc q3                           | 1.00         | (0.85, 1.18)        | 0.998        | 0.91            | (0.72, 1.16)        | 0.455        | 1.10          | (0.89, 1.38)        | 0.375        |
| Zip Inc q4                           | 1.07         | (0.92, 1.25)        | 0.394        | 0.98            | (0.78, 1.23)        | 0.858        | 1.16          | (0.94, 1.42)        | 0.170        |
| <b>366 days - 5 year Mortality</b>   |              |                     |              |                 |                     |              |               |                     |              |
| N (Events)                           | 5,473 (1518) |                     |              | 4,067 (901)     |                     |              | 1,406 (617)   |                     |              |
| Ed < HS                              | 1.22         | (0.98, 1.51)        | 0.071        | <b>1.36</b>     | <b>(1.04, 1.78)</b> | <b>0.023</b> | 0.99          | (0.69, 1.43)        | 0.966        |
| Ed HS < BS                           | <b>1.27</b>  | <b>(1.03, 1.57)</b> | <b>0.027</b> | <b>1.32</b>     | <b>(1.02, 1.71)</b> | <b>0.035</b> | 1.15          | (0.79, 1.66)        | 0.471        |
| Zip Inc q1                           | <b>1.27</b>  | <b>(1.02, 1.57)</b> | <b>0.029</b> | 1.29            | (0.98, 1.71)        | 0.071        | 1.23          | (0.89, 1.71)        | 0.205        |
| Zip Inc q2                           | 0.95         | (0.78, 1.15)        | 0.571        | 0.98            | (0.77, 1.25)        | 0.902        | 0.91          | (0.66, 1.24)        | 0.542        |
| Zip Inc q3                           | 0.91         | (0.76, 1.09)        | 0.309        | 0.98            | (0.78, 1.23)        | 0.851        | 0.83          | (0.62, 1.12)        | 0.221        |
| Zip Inc q4                           | 1.04         | (0.88, 1.24)        | 0.622        | 1.03            | (0.82, 1.28)        | 0.806        | 1.10          | (0.84, 1.46)        | 0.487        |

Abbreviations: RR = Relative Risk (In-hospital and Discharge - 365 day mortality); HRR = Hazard Rate Ratio (1-5 year

mortality); Ed < HS = Education less than a high school diploma; Ed HS < BS = At least a high school diploma, but no college degree

Adjusted for Age, race, hx of hypertension, hx of diabetes, hx of lipidemia, hx of CHD, hx of stroke, and coronary revascularization (PCI or CABG) during hospitalization, year of MI.

Education referent group is college degree or more.

Zip code median income referent group is quintile 5 (highest median income).

**Supplement Table 3 – Re-weighted association of education, and zip code median income quintile with recurrent myocardial infarction or fatal CHD within 1 year or 1-5 years in women surviving 28 days after a first apparent myocardial infarction.**

|                                           | All Women   |                     |                 | Women 66-79 years |              |        | Women 80+ years |                     |              |
|-------------------------------------------|-------------|---------------------|-----------------|-------------------|--------------|--------|-----------------|---------------------|--------------|
|                                           | HRR         | 95% Conf Int        | Pvalue          | HRR               | 95% Conf Int | Pvalue | HRR             | 95% Conf Int        | Pvalue       |
| Recurrent MI/Fatal CHD (29 days-365 days) |             |                     |                 |                   |              |        |                 |                     |              |
| N (Events)                                | 6,528 (889) |                     |                 | 3,646 (375)       |              |        | 2,882 (514)     |                     |              |
| Ed < HS                                   | 1.02        | (0.73, 1.43)        | 0.919           | 1.38              | (0.78, 2.45) | 0.273  | 0.91            | (0.60, 1.36)        | 0.634        |
| Ed HS < BS                                | 0.96        | (0.68, 1.34)        | 0.796           | 1.40              | (0.79, 2.48) | 0.244  | 0.82            | (0.54, 1.25)        | 0.351        |
| Zip Inc q1                                | 0.98        | (0.74, 1.30)        | 0.906           | 0.87              | (0.57, 1.33) | 0.518  | 1.06            | (0.73, 1.54)        | 0.774        |
| Zip Inc q2                                | 1.06        | (0.83, 1.36)        | 0.624           | 0.90              | (0.62, 1.30) | 0.573  | 1.19            | (0.86, 1.65)        | 0.300        |
| Zip Inc q3                                | 1.10        | (0.87, 1.38)        | 0.418           | 0.89              | (0.63, 1.26) | 0.519  | 1.28            | (0.94, 1.74)        | 0.121        |
| Zip Inc q4                                | 1.02        | (0.81, 1.30)        | 0.842           | 0.79              | (0.55, 1.14) | 0.207  | 1.24            | (0.91, 1.70)        | 0.174        |
| Recurrent MI/Fatal CHD (366 days-5 years) |             |                     |                 |                   |              |        |                 |                     |              |
| N (Events)                                | 4,681 (833) |                     |                 | 2,837 (402)       |              |        | 1,844 (431)     |                     |              |
| Ed < HS                                   | 1.33        | (0.94, 1.87)        | 0.107           | 1.03              | (0.64, 1.65) | 0.915  | <b>1.71</b>     | <b>(1.07, 2.72)</b> | <b>0.024</b> |
| Ed HS < BS                                | 1.12        | (0.79, 1.59)        | 0.531           | 0.76              | (0.47, 1.22) | 0.253  | <b>1.63</b>     | <b>(1.02, 2.63)</b> | <b>0.042</b> |
| Zip Inc q1                                | 0.76        | (0.57, 1.01)        | 0.055           | 0.72              | (0.47, 1.09) | 0.120  | 0.80            | (0.54, 1.17)        | 0.254        |
| Zip Inc q2                                | 0.91        | (0.72, 1.16)        | 0.458           | 1.04              | (0.74, 1.47) | 0.806  | 0.79            | (0.57, 1.10)        | 0.170        |
| Zip Inc q3                                | 0.86        | (0.68, 1.08)        | 0.200           | 0.86              | (0.62, 1.20) | 0.379  | 0.87            | (0.63, 1.20)        | 0.383        |
| Zip Inc q4                                | <b>0.66</b> | <b>(0.52, 0.84)</b> | <b>&lt;.001</b> | 0.73              | (0.52, 1.02) | 0.063  | <b>0.59</b>     | <b>(0.41, 0.85)</b> | <b>0.005</b> |

Abbreviations: HRR = Hazard Rate Ratio; Ed < HS = Education less than a high school diploma; Ed HS < BS = At least a high school diploma, but no college degree

Adjusted for Age, race, hx of hypertension, hx of diabetes, hx of lipidemia, hx of CHD, hx of stroke, and coronary revascularization (PCI or CABG) during hospitalization, year of MI.

Education referent group is college degree or more.

Zip code median income referent group is quintile 5 (highest median income).

**Supplement Table 4 – Re-weighted association of education, and zip code median income quintile with recurrent myocardial infarction or fatal CHD within 1 year or 1-5 years in men surviving 28 days after a first apparent myocardial infarction.**

|                                           | All Men     |                     |              | Men 66-79 years |                     |              | Men 80+ years |                     |              |
|-------------------------------------------|-------------|---------------------|--------------|-----------------|---------------------|--------------|---------------|---------------------|--------------|
|                                           | HRR         | 95% Conf Int        | Pvalue       | HRR             | 95% Conf Int        | Pvalue       | HRR           | 95% Conf Int        | Pvalue       |
| Recurrent MI/Fatal CHD (29 days-365 days) |             |                     |              |                 |                     |              |               |                     |              |
| N (Events)                                | 6,493 (832) |                     |              | 4,584 (484)     |                     |              | 1,909 (348)   |                     |              |
| Ed < HS                                   | 1.02        | (0.79, 1.32)        | 0.865        | 1.13            | (0.82, 1.55)        | 0.449        | 0.88          | (0.58, 1.34)        | 0.553        |
| Ed HS < BS                                | 0.80        | (0.61, 1.03)        | 0.087        | 0.74            | (0.54, 1.03)        | 0.076        | 0.89          | (0.58, 1.36)        | 0.584        |
| Zip Inc q1                                | 1.27        | (0.96, 1.69)        | 0.098        | 0.94            | (0.64, 1.37)        | 0.740        | <b>2.00</b>   | <b>(1.32, 3.03)</b> | <b>0.001</b> |
| Zip Inc q2                                | 1.24        | (0.96, 1.59)        | 0.095        | 1.18            | (0.85, 1.64)        | 0.314        | 1.29          | (0.88, 1.90)        | 0.184        |
| Zip Inc q3                                | 0.91        | (0.71, 1.17)        | 0.456        | 0.80            | (0.58, 1.10)        | 0.169        | 1.10          | (0.75, 1.63)        | 0.626        |
| Zip Inc q4                                | 1.14        | (0.91, 1.44)        | 0.255        | 0.99            | (0.74, 1.34)        | 0.964        | 1.40          | (0.98, 2.00)        | 0.064        |
| Recurrent MI/Fatal CHD (366 days-5 years) |             |                     |              |                 |                     |              |               |                     |              |
| N (Events)                                | 4,778 (774) |                     |              | 3,602 (494)     |                     |              | 1,176 (280)   |                     |              |
| Ed < HS                                   | <b>1.50</b> | <b>(1.10, 2.04)</b> | <b>0.011</b> | <b>1.64</b>     | <b>(1.13, 2.38)</b> | <b>0.010</b> | 1.24          | (0.71, 2.14)        | 0.451        |
| Ed HS < BS                                | 1.35        | (0.99, 1.83)        | 0.056        | 1.37            | (0.94, 1.98)        | 0.100        | 1.35          | (0.77, 2.35)        | 0.291        |
| Zip Inc q1                                | 1.28        | (0.93, 1.75)        | 0.130        | 1.23            | (0.83, 1.84)        | 0.304        | 1.38          | (0.83, 2.30)        | 0.220        |
| Zip Inc q2                                | 1.12        | (0.86, 1.45)        | 0.410        | 1.13            | (0.82, 1.55)        | 0.460        | 1.11          | (0.70, 1.75)        | 0.667        |
| Zip Inc q3                                | 0.99        | (0.77, 1.27)        | 0.910        | 0.98            | (0.72, 1.34)        | 0.894        | 1.00          | (0.65, 1.53)        | 1.000        |
| Zip Inc q4                                | 1.07        | (0.84, 1.36)        | 0.602        | 0.97            | (0.71, 1.31)        | 0.827        | 1.30          | (0.86, 1.96)        | 0.209        |

Abbreviations: HRR = Hazard Rate Ratio; Ed < HS = Education less than a high school diploma; Ed HS <BS = At least a high school diploma, but no college degree

Adjusted for Age, race, hx of hypertension, hx of diabetes, hx of lipidemia, hx of CHD, hx of stroke, and coronary revascularization (PCI or CABG) during hospitalization, year of first MI.

Education referent group is college degree or more.

Zip code median income referent group is quintile 5 (highest median income).
